# Supplementary material
Source: PubMed Central journal article supplement (PMC1544235)
Supplement: pnas_0604564103_1.pdf [file pnas_0604564103_1.pdf]

| <u>Animal No.</u> | <u>V-REGION</u>    | <u>P</u> | <u>N1</u>  | <u>P</u> | <u>D-REGION</u>      | <u>P</u> | <u>N2</u> | <u>P</u> | <u>J-REGION</u>        |
|-------------------|--------------------|----------|------------|----------|----------------------|----------|-----------|----------|------------------------|
| TCL1-001          | ...TGTGCAGGA       |          |            |          | GACAGGAGAGG          |          |           |          | TTACTGGTACTTCGATGTCTGG |
| TCL1-002          | ...TGTGCAGGA       |          |            |          | GACAGAACTGG          |          |           |          | GTACTGGTACTTCGATGTCTGG |
| TCL1-003          | ...TGTGCAAGAC      |          |            |          | ATTACTACGGTAGTA      |          |           |          | GCTACTTTGACTACTGG      |
| TCL1-004          | ...TGTGCAAGAC      |          |            |          | ATTACTACGGTAGTA      |          |           |          | GCTACTTCGATGTCTGG      |
| TCL1-005          | ...TGTATGAGA       |          |            |          | TACGGTAGTAG          |          |           |          | CTACTGGTACTTCGATGTCTGG |
| TCL1-006          | ...TGTATGAGA       |          |            |          | TATAGTAA             |          |           |          | CTACTGGTACTTCGATGTCTGG |
| TCL1-007          | ...TGTGCAAGA       |          |            | A        | TTTATTACTACGGTAG     |          |           |          | TAGCTATGCTATGGACTACTGG |
| TCL1-008          | ...TGTGCAAGA       |          |            |          | TCTTACTACGATGGTAGC   |          |           |          | TACTATGCTATGGACTACTGG  |
| TCL1-009          | ...TGTGCAAGA       |          | AGG        |          | TACTACGGTAGTAG       |          |           |          | CTGGTACTTCGATGTCTGG    |
| TCL1-010          | ...TGTGCAAGA       |          | AT         |          | TTACTACGGTAGTAG      |          |           |          | CTACTGGTACTTCGATGTCTGG |
| TCL1-011          | ...TGTGCAAGA       |          | C          |          | GGTGGTTACTAC         |          | T         |          | GTTTGCTTACTGG          |
| TCL1-012          | ...TGTGCAAGA       | T        | TAGGGGGAAC | G        | CTAACTGGGAC          | GT       |           |          | CCTGGTTTGGCTTACTGG     |
| TCL1-013          | ...TGTACAATA       | T        | ACTGGG     |          | TCTTTGACTA           |          |           |          | CTGG                   |
| TCL1-014          | ...TGTGCAAGA       | T        |            |          | CCTACTATAGTTACTATAGT |          |           |          | TACTTTGACTACTGG        |
| TCL1-015          | ...TGTGCACTA       |          |            |          | ACTGGG               |          |           |          | ACGGACTACTGG           |
| TCL1-016          | ...TGCACAAGA       |          | CAGAA      |          | AATATGGTGG           |          | C         |          | AGGGGTACTTCGATGTCTGG   |
| TCL1-017          | ...TGTGCAAGA       |          | GG         |          | TGATGGTTACTAC        | GT       | G         |          | GCTTACTGG              |
| TCL1-018          | ...TGTGCAAAAC      |          | TG         |          | AACTGGG              |          |           |          | ACGCCTTTGACTACTGG      |
| TCL1-019          | ...TGCACAAGC       |          |            |          | TGGGAC               | G        |           |          | TCGGCTACTGG            |
| TCL1-020          | ...TGTGCAAGAGATGCA |          | GG         |          | TAACTGGG             |          |           |          | ACTATGCTATGGACTACTGG   |
