# Supplementary material
Source: PubMed Central journal article supplement (PMC1544235)
Supplement: pnas_0604564103_2.pdf [file pnas_0604564103_2.pdf]

**A**

```

          FR1          CDR1          FR2          CDR2          FR3          CDR3          FR4
TCL1-005 EFRLVESGGGLVQPGGSRGLSCEGS GFTFSGFW MSWVRQTPGKLEWIGD INSDGSAI NYAPSIKDRFTIFRDNDKSTLYLQMSNVRSEDATATYF CMR YGSSYWFYFDV WGTGTTVTVSSE
TCL1-006 .....L.....N.....S.....S.....N.....
U64422 .....
U64424 .....S.....N.....
X53343 .....D.....N.....
U64425 .....NH.....
U64357 .....S.....
X53346 .....S.....P.....
U64412 .....S.....N.....
    
```

| Gene No. | Source                   | VH family | VH gene | D gene   | JH gene | Reference  | Comments                                         |
|----------|--------------------------|-----------|---------|----------|---------|------------|--------------------------------------------------|
| TCL1-005 | TCL1 mouse               | 11        | V11S1   | DFL16.1  | 1       | This study |                                                  |
| TCL1-006 | TCL1 mouse               | 11        | V11S1   | DSP2.x   | 1       | This study |                                                  |
| U64422   | Anti-phosphatidylcholine | 11        | V11S1   | DFL16.1  | 1       | Ref. 1     | Identical to X53345 (Ref. 2)                     |
| U64424   | Anti-phosphatidylcholine | 11        | V11S1   | DSP2.x   | 1       | Ref. 1     |                                                  |
| X53343   | Anti-phosphatidylcholine | 11        | V11S1   | DSP2.2   | 1       | Ref. 2     |                                                  |
| U64425   | Anti-phosphatidylcholine | 11        | V11S1   | DSP2.1   | 1       | Ref. 1     |                                                  |
| U64357   | Anti-phosphatidylcholine | 11        | V11S1   | DFL16.1  | 1       | Ref. 1     | Identical to U64358 (Ref. 1)                     |
| X53346   | Anti-phosphatidylcholine | 11        | V11S1   | DFL16.AF | 1       | Ref. 2     |                                                  |
| U64412   | Anti-phosphatidylcholine | 11        | V11S1   | DSP2.1   | 1       | Ref. 1     | Identical to U64373 (Ref. 1) and M34576 (Ref. 3) |

**B**

```

          FR1          CDR1          FR2          CDR2          FR3          CDR3          FR4
TCL1-007 VQLQESGAELVKPGASVKMSCKAS GYTFTSYW ITWVKQRPGGLEWIGD IYPGSGST NYNEKFKSKATLTVDTSSSTAYMQLSSLTSEDSAVYY CAR IYYGSSYAMDY WQGTTVTVSS
TCL1-008 .....L.....N.....N.....S.....S.....D.....Y.....
M15226 .....Q.....AR.....L.....MG.....D.....D.....R.....TQ.....G.....A.....K.....F.....
X05762 .....G.....N.....X.....XX.....Y.....N.....N.....Y.....K.....G.....L.....X.....R.....X.....XXXX.....S.....G.....X.....X.....
    
```

| Gene No. | Source                                     | VH family | VH gene | D gene  | JH gene | Reference  |
|----------|--------------------------------------------|-----------|---------|---------|---------|------------|
| TCL1-007 | TCL1 mouse                                 | 1         | V165.1  | DFL16.1 | 4       | This study |
| TCL1-008 | TCL1 mouse                                 | 1         | V1S61   | DFL16.1 | 4       | This study |
| M15226   | Anti-5-dimethylaminonaphthalene-1-sulfonyl | 1         | J558.19 | DFL16.1 | 4       | Ref. 4     |

|        |                       |   |           |         |   |        |
|--------|-----------------------|---|-----------|---------|---|--------|
| X05762 | Anti-Brucella abortus | 1 | VhId (CR) | DFL16.1 | 4 | Ref. 5 |
|--------|-----------------------|---|-----------|---------|---|--------|
