# Supplementary material
Source: PubMed Central journal article supplement (PMC1544235)
Supplement: pnas_0604564103_4.pdf [file pnas_0604564103_4.pdf]

**A.**

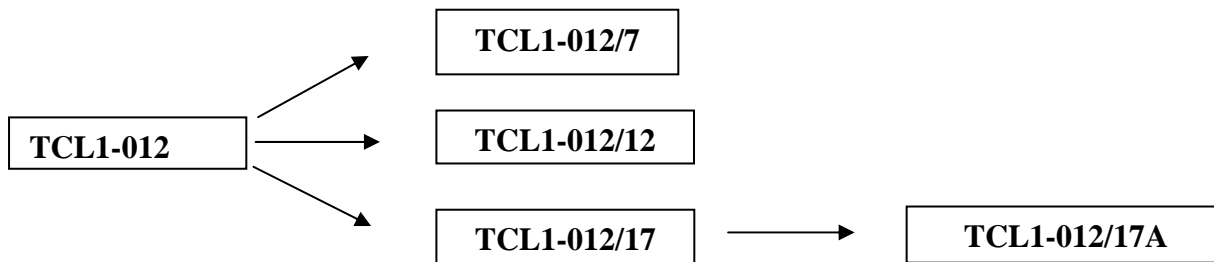

| TCL1 No.     | Source | Isotype | Clone | V family | V gene | % difference from germline | CDR3 Length | D gene | RF* | J gene | CDR3               | pI   |
|--------------|--------|---------|-------|----------|--------|----------------------------|-------------|--------|-----|--------|--------------------|------|
| TCL1-012     | Spleen | IgM     | Major | VH1      | XE1    | 0.7%                       | 16          | Q52    | 3   | JH3    | CAR LGGTLTGTS WFAY | 9.05 |
|              |        |         | Minor | VH12     | NC1-A7 | 0.7%                       | 13          | SP2.9  | 3   | JH1    | CAG DYDG YWYFDV    | 3.1  |
|              |        |         | Minor | VH1      | XE1    | 3.1%                       | 12          | FL16.1 | 3   | JH4    | CAR SGY YYAMDY     | 5.95 |
|              |        | κ       | Major | Vκ17     | bt20   | 0.0%                       | 14          |        |     | Jκ4    | CLQ SDNLPF TFGSG   | 3.43 |
|              |        |         | Minor | Vκ4      | kf4    | 0.3%                       | 13          |        |     | Jκ5    | CQQ GSSILT FGAG    | 5.5  |
| TCL1-012/7   | Spleen | IgM     | Major | VH1      | XE1    | 1.1%                       | 16          | Q52    | 3   | JH3    | CAR LGGTLTGTS WFAY | 9.05 |
|              |        | κ       | Major | Vκ17     | bt20   | 0.0%                       | 14          |        |     | Jκ4    | CLQ SDNLPF TFGSG   | 3.43 |
| TCL1-012/12  | Spleen | IgM     | Major | VH1      | XE1    | 0.3%                       | 16          | Q52    | 3   | JH3    | CAR LGGTLTGTS WFAY | 9.05 |
|              |        | κ       | Major | Vκ17     | bt20   | 0.0%                       | 14          |        |     | Jκ4    | CLQ SDNLPF TFGSG   | 3.43 |
| TCL1-012/17  | Spleen | IgM     | Major | VH1      | XE1    | 0.3%                       | 16          | Q52    | 3   | JH3    | CAR LGGTLTGTS WFAY | 9.05 |
|              |        | κ       | Major | Vκ17     | bt20   | 0.0%                       | 14          |        |     | Jκ4    | CLQ SDNLPF TFGSG   | 3.43 |
| TCL1-012/17A | Spleen | IgM     | Major | VH1      | XE1    | 0.3%                       | 16          | Q52    | 3   | JH3    | CAR LGGTLTGTS WFAY | 9.05 |
|              |        | κ       | Major | Vκ17     | bt20   | 0.0%                       | 14          |        |     | Jκ4    | CLQ SDNLPF TFGSG   | 3.43 |

**B.**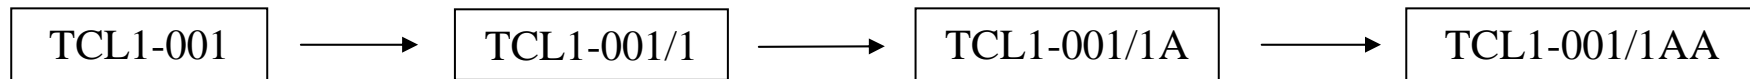

| TCL1 No.     | Source | Isotype | Clone | V family | V gene | % difference from germline | CDR3 Length | D gene | RF* | J gene | CDR3 |         |       | pI   |
|--------------|--------|---------|-------|----------|--------|----------------------------|-------------|--------|-----|--------|------|---------|-------|------|
| TCL1-001     | Spleen | IgM     | Major | VH12     | NC1-A7 | 0.0%                       | 13          | ST4    | 2   | JH1    | CAG  | DRRGY   | WYFDV | 6.09 |
|              |        |         | Minor | VH1      | V165.1 | 0.3%                       | 14          | FL16.1 | 3   | JH1    | CAR  | RYYGSS  | WYFDV | 6.2  |
|              |        | κ       | Major | Vκ4      | V4-91  | 0.0%                       | 14          |        |     | Jκ5    | CQQ  | GSSIPLT | FGAG  | 5.5  |
| TCL1-001/1   | Spleen | IgM     | Major | VH12     | NC1-A7 | 0.0%                       | 13          | ST4    | 2   | JH1    | CAG  | DRRGY   | WYFDV | 6.09 |
|              |        | κ       | Major | Vκ4      | V4-91  | 0.0%                       | 14          |        |     | Jκ5    | CQQ  | GSSIPLT | FGAG  | 5.5  |
| TCL1-001/1A  | LN     | IgM     | Major | VH12     | NC1-A7 | 0.3%                       | 13          | ST4    | 2   | JH1    | CAG  | DRRGY   | WYFDV | 6.09 |
|              |        | κ       | Major | Vκ4      | V4-91  | 0.0%                       | 14          |        |     | Jκ5    | CQQ  | GSSIPLT | FGAG  | 5.5  |
| TCL1-001/1AA | Spleen | IgM     | Major | VH12     | NC1-A7 | 0.0%                       | 13          | ST4    | 2   | JH1    | CAG  | DRRGY   | WYFDV | 6.09 |
|              |        | κ       | Major | Vκ4      | V4-91  | 0.0%                       | 14          |        |     | Jκ5    | CQQ  | GSSIPLT | FGAG  | 5.5  |
