# Supplementary material
Source: PubMed Central journal article supplement (PMC1544235)
Supplement: pnas_0604564103_5.pdf [file pnas_0604564103_5.pdf]

**Table 4. Molecular genetic characteristics of immunoglobulin heavy chain (IgH chain) V region segments and HCDR3 of TCL1 mice**

| Animal no. | Source | Isotype  | V <sub>H</sub> family | V <sub>H</sub> gene | % difference from germ line | HCDR3 length | D           | RF*   | J <sub>H</sub> gene | HCDR3                  | pI   |
|------------|--------|----------|-----------------------|---------------------|-----------------------------|--------------|-------------|-------|---------------------|------------------------|------|
| TCL1-012   | Spleen | IgM      | 12                    | NC1-A7              | 0.7%                        | 13           | SP2.9       | 3     | 1                   | AG DYDG YWYFDV         | 3.1  |
|            |        |          | 1                     | XE1                 | 3.1%                        | 12           | FL16.1      | 3     | 4                   | AR SGY YYAMDY          | 5.95 |
| TCL1-001   | Spleen | IgM      | 1                     | V165.1              | 0.3%                        | 14           | FL16.1      | 3     | 1                   | AR RYYGSS WYFDV        | 8.79 |
| TCL1-009   | Spleen | IgM      | 1                     | V6                  | 3.5%                        | 14           | FL16.1      | 3     | 1                   | AR RYYGSS WYFDV        | 8.79 |
| TCL1-017   | LN     | IgM      | 3                     | XE2                 | 1.0%                        | 12           | FL16.1      | 3     | 1                   | AR EDYYGS GAF          | 4.12 |
|            |        |          | 7                     | V13                 | 0.3%                        | 15           | ST4 + SP2.5 | 2 + 1 | 1                   | VK AVSMVTT GTSMS       | 8.9  |
|            |        |          | 9                     | VGK1A               | 1.7%                        | 12           | SP2.x       | 3     | 1                   | AR SSNY GYFDY          | 5.95 |
| TCL1-015   | Spleen | IgM      | 1                     | 22.11               | 4.2%                        | 14           | SP2.9       | 3     | 1                   | AR RSPDG YWYFDV        | 6.09 |
| TCL1-016   | Spleen | IgM, IgG | 2                     | VOX-1               | 0.3%                        | 7            | SP2.13      | 2     | 2                   | AK L VDY               | 5.95 |
|            |        |          | 1                     | V1S6                | 7.9%                        | 21           | SP2.12      | 3     | 2                   | AR EVDYSYYSYDAE NYAMDF | 3.43 |
|            |        |          | 1                     | J558.47             | 7.6%                        | 15           | ST4         | 1     | 3                   | AR PPQVGLQT WFAH       | 9.01 |
|            |        |          | 5                     | V5S10               | 7.0%                        | 12           | SP2.12      | 3     | 1                   | AR HGYSNYL DF          | 7.14 |
|            |        |          | 1                     | J558.33             | 1.7%                        | 7            | ND          | NA    | 1                   | TK EGA Y               | 6.27 |
|            |        |          | 1                     | V1S16               | 0.6%                        | 14           | SP2.9       | 2     | 2                   | TI RGWLPSY YFDY        | 6.08 |
|            |        |          | 7                     | V7S3                | 0.3%                        | 14           | SP2.9       | 3     | 1                   | AR DNGYYEG AMDY        | 3.7  |
| TCL1-007   | LN     | IgM, IgG | 2                     | Vox-1               | 0.7%                        | 7            | SP2.13      | 2     | 2                   | AK L VDY               | 5.95 |

| Animal no. | Source | Isotype | V <sub>H</sub> family | V <sub>H</sub> gene | % difference from germ line | HCDR3 length | D      | RF* | J <sub>H</sub> gene | HCDR3                | pI   |
|------------|--------|---------|-----------------------|---------------------|-----------------------------|--------------|--------|-----|---------------------|----------------------|------|
| TCL1-008   | LN     | IgM     | 1                     | V303                | 0.3%                        | 19           | FL16.1 | 3   | 1                   | AR KGKNYYGSSY WYYFDY | 9.19 |
|            |        |         | 1                     | V1S61               | 0.7%                        | 11           | Q52    | 2   | 4                   | AP NWAY AMDY         | 3.43 |
|            |        |         | 1                     | V165.1              | 1.0%                        | 11           | Q52    | 2   | 4                   | AP NWAY AMDY         | 3.43 |
|            | Spleen |         | 1                     | V119.1              | 1.0%                        | 15           | SP2.9  | 3   | 4                   | AR SRGYLYY AMDY      | 8.67 |

Red letters indicate basic, positively charged amino acids; green letters indicate acidic, negatively charged amino acids.

\*, D segment reading frame. RF no. 1 starts from the first nucleotide of germ-line segment, no. 2 starts from the second, and no. 3 starts from the third.

ND, not detectable; NA, not applicable.
