# Supplementary material
Source: PubMed Central journal article supplement (PMC1544235)
Supplement: pnas_0604564103_6.pdf [file pnas_0604564103_6.pdf]

**Table 5. Molecular genetic characteristics of Ig L chain V region segments and CDR3 of TCL1 mice**

| Animal no. | Source | Isotype | V <sub>L</sub> family | V <sub>L</sub> gene | % difference from germ line | LCDR3 length | J <sub>L</sub> gene | LCDR3          |                                  |                | pI   |
|------------|--------|---------|-----------------------|---------------------|-----------------------------|--------------|---------------------|----------------|----------------------------------|----------------|------|
| TCL1-012   | Spleen | κ       | Vκ4                   | V4-91               | 0.3%                        | 13           | Jκ5                 | QQ             | GSSILT                           | FGAG           | 5.5  |
| TCL1-018   | Spleen | κ       | Vκ3                   | V3-2                | 0%                          | 12           | Jκ4                 | QH             | NHGSFLP                          | FT             | 7.17 |
|            |        |         | Vκ8                   | V8-19               | 12.2%                       | 10           | Jκ2                 | QQ             | SF <sup>E</sup> VP               | YT             | 3.62 |
| TCL1-017   | LN     | κ       | Vκ8                   | V8-34               | 2.1%                        | 10           | Jκ5                 | QQ             | SYSA                             | PLT            | 5.5  |
|            |        |         | Vκ5                   | V5-43               | 0.0%                        | 10           | Jκ1                 | QQ             | SNSWP                            | WT             | 5.5  |
|            |        |         | Vκ3                   | V3-2                | 0.0%                        | 10           | Jκ2                 | QQ             | SK <sup>E</sup> V <sup>P</sup> Y | T              | 6.13 |
|            |        |         | Vκ3                   | V3-10               | 0.0%                        | 10           | Jκ2                 | QQ             | NN <sup>E</sup> D <sup>Y</sup>   | YT             | 3.32 |
|            |        |         | Vκ14                  | V14-111             | 8.9%                        | 11           | Jκ4                 | LQ             | HG <sup>E</sup> H <sup>S</sup> P | FT             | 6.0  |
| TCL1-015   | Spleen | κ       | Vκ4                   | V4-59               | 0.6%                        | 9            | Jκ1                 | H <sup>Q</sup> | WSSY                             | R <sup>T</sup> | 9.05 |
|            |        |         | Vκ3                   | V3-2                | 2.6%                        | 10           | Jκ1                 | QQ             | SK <sup>E</sup> V <sup>P</sup>   | WT             | 6.13 |
|            |        |         | Vκ6                   | V6-15               | 0.0%                        | 10           | Jκ2                 | QQ             | YNSYP                            | YT             | 5.5  |
|            |        |         | Vκ14                  | V14-111             | 0.0%                        | 10           | Jκ2                 | LQ             | HG <sup>E</sup> S <sup>P</sup>   | YT             | 5.14 |
|            |        |         | Vκ4                   | V4-59               | 0.6%                        | 9            | Jκ1                 | H <sup>Q</sup> | WSSY                             | R <sup>T</sup> | 9.05 |
| TCL1-016   | Spleen | κ       | Vκ1                   | V1-110              | 1.4%                        | 10           | Jκ1                 | S <sup>Q</sup> | STH <sup>V</sup> P               | QT             | 7.0  |
|            |        |         | Vκ6                   | V6-15               | 0.0%                        | 10           | Jκ1                 | QQ             | YNSYP                            | LT             | 5.5  |
|            |        |         | Vκ14                  | V14-111             | 0.0%                        | 10           | Jκ4                 | LQ             | HG <sup>E</sup> S <sup>P</sup>   | FT             | 5.14 |

| Animal no. | Source   | Isotype | V <sub>L</sub> family | V <sub>L</sub> gene | % difference from germ line | LCDR3 length | J <sub>L</sub> gene | LCDR3        | pI   |
|------------|----------|---------|-----------------------|---------------------|-----------------------------|--------------|---------------------|--------------|------|
|            |          |         | V <sub>κ</sub> 19     | V19-93              | 0.7%                        | 10           | J <sub>κ</sub> 2    | LQ YDNLL YT  | 3.43 |
|            |          |         | V <sub>κ</sub> 4      | V4-91               | 0.0%                        | 11           | J <sub>κ</sub> 4    | QQ GSSIPN FT | 5.5  |
|            |          |         | V <sub>κ</sub> 6      | V6-23               | 4.1%                        | 10           | J <sub>κ</sub> 4    | QQ YSNYP FT  | 5.5  |
| TCL1-007   | Spl & LN | κ       | V <sub>κ</sub> 9      | V9-124              | 0.0%                        | 10           | J <sub>κ</sub> 1    | LQ YASYP VD  | 3.43 |
| TCL1-018   | Spl & LN | κ       | V <sub>κ</sub> 4      | V4-57               | 0.0%                        | 10           | J <sub>κ</sub> 5    | QQ RSSYP LT  | 9.05 |
|            |          |         | V <sub>κ</sub> 6      | V6-32               | 0.0%                        | 10           | J <sub>κ</sub> 2    | QQ DYSSP LT  | 3.43 |
|            |          |         | V <sub>κ</sub> 3      | V3-9                | 0.0%                        | 10           | J <sub>κ</sub> 1    | MQ SMEDP WT  | 3.32 |
|            |          |         | V <sub>κ</sub> 19     | V19-93              | 0.7%                        | 10           | J <sub>κ</sub> 4    | LQ YDNLL FT  | 3.43 |

Red letters indicate basic, positively charged amino acids; green letters indicate acidic, negatively charged amino acids.

Spl, spleen; LN, lymph node.
