# Supplementary material
Source: PubMed Central journal article supplement (PMC1544235)
Supplement: pnas_0604564103_7.pdf [file pnas_0604564103_7.pdf]

**Table 6. Information about individual TCL1 animals**

| Manuscript animal no. | Laboratory of origin | Laboratory animal designation | Anatomic source* | Ig isotype(s) |
|-----------------------|----------------------|-------------------------------|------------------|---------------|
| TCL1-001              | Croce                | 192                           | Spleen           | IgM           |
| TCL1-002              | Efremov              | CG4                           | Spleen           | ?             |
| TCL1-003              | Efremov              | NF1h                          | Spleen           | ?             |
| TCL1-004              | Efremov              | NF2d                          | Spleen           | ?             |
| TCL1-005              | Efremov              | F2                            | PB               | ?             |
| TCL1-006              | Efremov              | PV5f                          | Spleen           | ?             |
| TCL1-007              | Croce                | 500                           | Spleen and LN    | IgM           |
| TCL1-008              | Croce                | 510                           | Spleen and LN    | IgM           |
| TCL1-009              | Croce                | 288                           | Spleen           | IgM           |
| TCL1-010              | Chiorazzi            | 1620                          | Spleen           | IgM           |
| TCL1-011              | Efremov              | NF6a                          | PB               | ?             |
| TCL1-012              | Croce                | 178                           | Spleen           | IgM           |
| TCL1-013              | Croce                | 410                           | Spleen           | IgM           |
| TCL1-014              | Croce                | 430                           | Spleen           | IgM           |
| TCL1-015              | Croce                | 440                           | Spleen           | IgM           |
| TCL1-016              | Croce                | 450                           | Spleen           | IgM           |
| TCL1-017              | Croce                | 420                           | LN               | IgM           |
| TCL1-018              | Croce                | 294                           | Spleen           | IgM           |
| TCL1-019              | Efremov              | NF1b                          | Spleen           | ?             |
| TCL1-020              | Efremov              | NF3g                          | Spleen           | ?             |
| TCL1-021              | Croce                | 232                           | Spleen           | IgM, IgG      |

LN, lymph node; PB, peripheral blood.
