# Supplementary material
Source: PubMed Central journal article supplement (PMC1544235)
Supplement: pnas_0604564103_8.pdf [file pnas_0604564103_8.pdf]

**Data Set 1. Sense and antisense primers used for PCR amplification of murine Ig VH and Vκ genes**

**VH FR1 primers (forward):**

**VHALL:** AGGTSMARCTGCAGSAGTCWGG  
**mH2:** CTTCCGGAATTCARGTNMAGCTGSAGSAGTCWGG (1)  
**VHMF1:** AGGTCCAGCTGCAGGAGTCTGG (2)  
**VHMF2:** AGGTCCAGCTGCAGGAGTCAGG  
**VHMF3:** AGGTCCAGCTTCAGGAGTCTGG  
**VHMF4:** AGGTCCAGCTTCAGGAGTCAGG  
**VHMF5:** AGGTCCAACCTGCAGGAGTCTGG  
**VHMF6:** AGGTCCAACCTGCAGGAGTCAGG  
**VHMF7:** AGGTCCAACCTCAGGAGTCTGG  
**VHMF8:** AGGTCCAACCTCAGGAGTCAGG

**JH primer (reverse):**

**VHR2:** TGAGGAGACGGTGACCGTGGTCCCTTGGCCCC

**CH primer (reverse):**

**MCR:** CAGATCTCTGTTTTTGCCTCCGTA  
**G1CR:** ATGCAAGGCTTACAACCACAATCC  
**ACR:** TAATAGGAGGAGGAGGAGTAGGAC

**Vκ FR1 universal degenerate primer (forward):**

**mκ:** GGGAGCTCGAYATTGTGMTSACMCARWCTMCA (1)

**Cκ primer (reverse):**

**κc:** GGTGCATGCGGATACAGTTGGTGCAGCATC (1)

1. Wang, Z., Raifu, M., Howard, M., Smith, L., Hansen, D., Goldsby, R. & Ratner, D. (2000) *J. Immunol. Methods* **233**, 167–177.

2. White, H. N. (1998) *Eur. J. Immunol.* **28**, 3268–3279.
