# Supplementary material
Source: PubMed Central journal article supplement (PMC1544235)
Supplement: pnas_0604564103_9.pdf [file pnas_0604564103_9.pdf]

**Data Set 2. Sense and antisense primers used to amplify and identify of murine germ-line VH genes**

**XE1 (for TCL1-012 major clone)\***

**J558.24F:** 5'-AATGGAGCTGGGTCTTTC-3'  
**J558.24R:** 5'-TCAGGATGTGGTTACAACAC-3'  
**VH1S39F:** 5'-TGACAAAGTCATCCACTGTG-3'  
**VH1S39R:** 5'-CTCCAGGGTTTCTGACACAC-3'

**XE2 (for TCL1-017 major clone)†**

**V3S6F1:** 5'-TATGGGATGGAAGTGGGA-3'  
**V3S6F2:** 5'-CTGTTGTACCTGTTGACAGC-3'  
**V3S6R:** 5'-CTGTGAGAGTGGTGCCTTGG-3'

**XE3 (for TCL1-015 major clone)‡**

**J558.11F:** 5'-CAGCTGTCCACTCTGAGATCC-3'  
**J558.11F2:** 5'-GCAGGAGTCAGGACC-3'  
**J558.11R:** 5'-ATGTTGACTGTGCTG-3'  
**J558.24R:** 5'-TCAGGATGTGGTTACAACAC-3'

**22.11 (for TCL1-009 minor clone)§**

**22.11F1:** 5'-CAAGGCTTCTGGTTTCTCGT-3'  
**22.11F2:** 5'-TTGAGTGGATTGGGGAGATT-3'  
**22.11R:** 5'-ATGTAGGCTGTGCTGGAGGA-3'

**V6 (for TCL1-015 minor clone)§**

**V6 F1:** 5'-AGCTTGAGGTGTGGCCATAC-3'  
**V6 F2:** 5'-CCATACACTTGACTGGC-3'  
**V6 F3:** 5'-GGGCTCACAGTAGCAAGC-3'  
**V6 R:** 5'-CCAGGTTTTCTGACACTCTC-3'

\*New germ-line gene defined, XE1 (GenBank accession no. DQ093183).

†New germ-line gene defined, XE2 (GenBank accession no. DQ093184).

‡New germ-line gene defined, XE3 (GenBank accession no. DQ093185).

§No new germ-line gene defined.
