# Supplementary material
Source: PubMed Central journal article supplement (PMC1544235)

**A.**

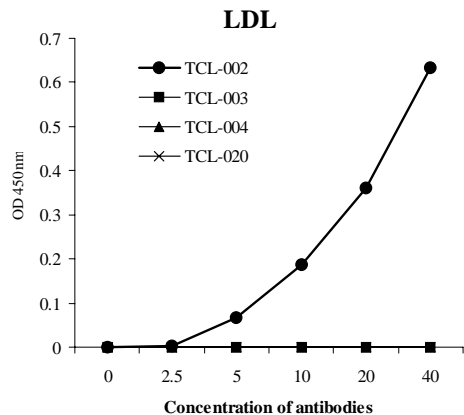

**B.**

|                 | 40 µg/ml | 20 µg/ml | 10 µg/ml |
|-----------------|----------|----------|----------|
| <b>TCL1-002</b> | 3+       | 1+       | Neg      |
| <b>TCL1-003</b> | Neg      | Neg      | Neg      |
| <b>TCL1-004</b> | Neg      | Neg      | Neg      |
| <b>TCL1-020</b> | 1+       | Neg      | Neg      |

**C.**

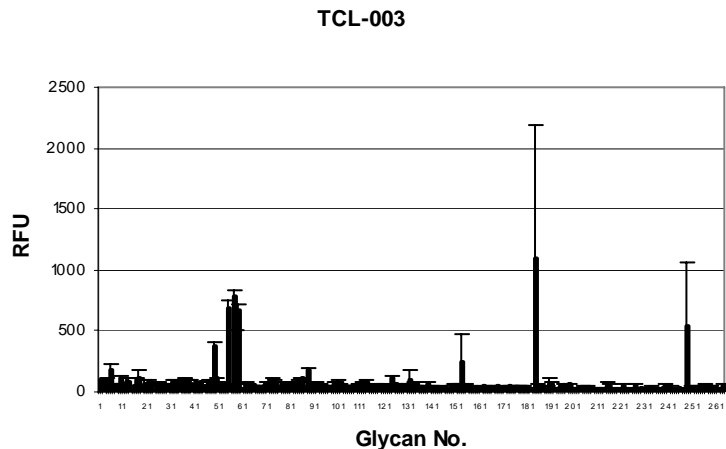

**D.**

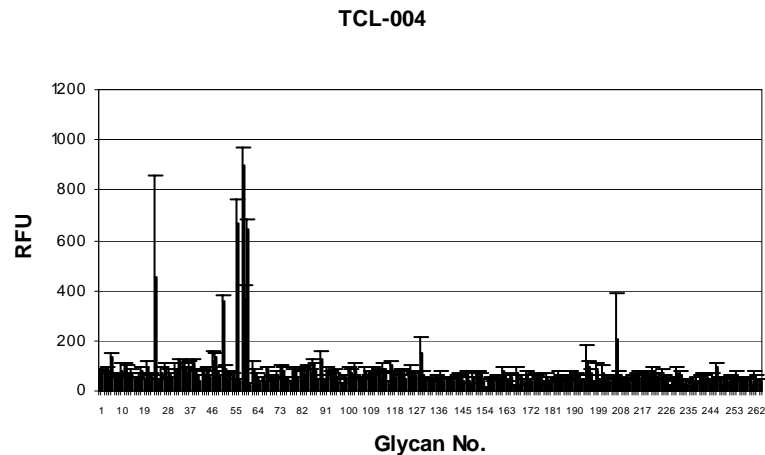

Supplement: pnas_0604564103_3.pdf [file pnas_0604564103_3.pdf]
